# Supplementary material for: Single platinum atoms anchored on N-doped carbon materials composed of bipyridine as efficient hydrogen evolution electrocatalysts
Source: Royal Society of Chemistry journal article supplement (doi:10.1039/d2qm01370c), 2023-01-01
Supplement: d2qm01370c1.pdf [file d2qm01370c1.pdf]

## Electronic Supplementary Information

### **Single platinum atoms anchored on N-doped carbon materials composed of bipyridine as efficient hydrogen evolution electrocatalysts**

Shengliang Zhai, Dong Zhai, Lanju Sun, Nianyun Feng, Xiaokang Chen, Wei-Qiao Deng and Hao Wu\*

*Institute of Molecular Sciences and Engineering, Institute of Frontier and Interdisciplinary Science, Shandong University, Qingdao, Shandong, 266237, China.*

\*Corresponding author

E-mail: [haowu2020@sdu.edu.cn](mailto:haowu2020@sdu.edu.cn) (H. W.)

## Calculations

We carried out density functional calculations to calculate the binding energies between Bpy-derived CTF and the three Pt salts (Pt(NO<sub>3</sub>)<sub>2</sub>, Pt(acac)<sub>2</sub>, K<sub>2</sub>PtCl<sub>4</sub>) using Gaussian 16 software.<sup>[1]</sup> All structures were optimized using M06 functional.<sup>[2]</sup> The 6-31G\*\* basis set was used for C, H, O, N, and Cl atoms, and the SDD basis set was used for Pt atom. The basis set superposition error was considered in the calculations. A building block fragment of CTF was used as the model to represent the CTF. The binding energies were calculated using:

$$E_{bind} = E_{CTF-Pt} - E_{CTF} - E_{Pt}$$

where  $E_{CTF-Pt}$  is the energy of the complex of CTF model and Pt salt.  $E_{CTF}$  and  $E_{Pt}$  are the energies of the CTF model and Pt salt, respectively.

## Reference

- [1] M. J. Frisch, G. W. Trucks, H. B. Schlegel, G. E. Scuseria, M. A. Robb, J. R. Cheeseman, G. Scalmani, V. Barone, G. A. Petersson, H. Nakatsuji, X. Li, M. Caricato, A. V. Marenich, J. Bloino, B. G. Janesko, R. Gomperts, B. Mennucci, H. P. Hratchian, J. V. Ortiz, A. F. Izmaylov, J. L. Sonnenberg, D. Williams-Young, F. Ding, F. Lipparini, F. Egidi, J. Goings, B. Peng, A. Petrone, T. Henderson, D. Ranasinghe, V. G. Zakrzewski, J. Gao, N. Rega, G. Zheng, W. Liang, M. Hada, M. Ehara, K. Toyota, R. Fukuda, J. Hasegawa, M. Ishida, T. Nakajima, Y. Honda, O. Kitao, H. Nakai, T. Vreven, K. Throssell, J. A. Montgomery, Jr., J. E. Peralta, F. Ogliaro, M. J. Bearpark, J. J. Heyd, E. N. Brothers, K. N. Kudin, V. N. Staroverov, T. A. Keith, R. Kobayashi, J. Normand, K. Raghavachari, A. P. Rendell, J. C. Burant, S. S. Iyengar, J. Tomasi, M. Cossi, J. M. Millam, M. Klene, C. Adamo, R. Cammi, J. W. Ochterski, R. L. Martin, K. Morokuma, O. Farkas, J. B. Foresman, and D. J. Fox, Gaussian, Inc., Wallingford CT, 2016. Gaussian 16, Revision B.01.
- [2] Zhao, Y.; Truhlar, D. G. The M06 Suite of Density Functionals for Main Group Thermochemistry, Thermochemical Kinetics, Noncovalent Interactions, Excited States, and Transition Elements. *Theor. Chem. Acc.* 2008, 120, 215-241.

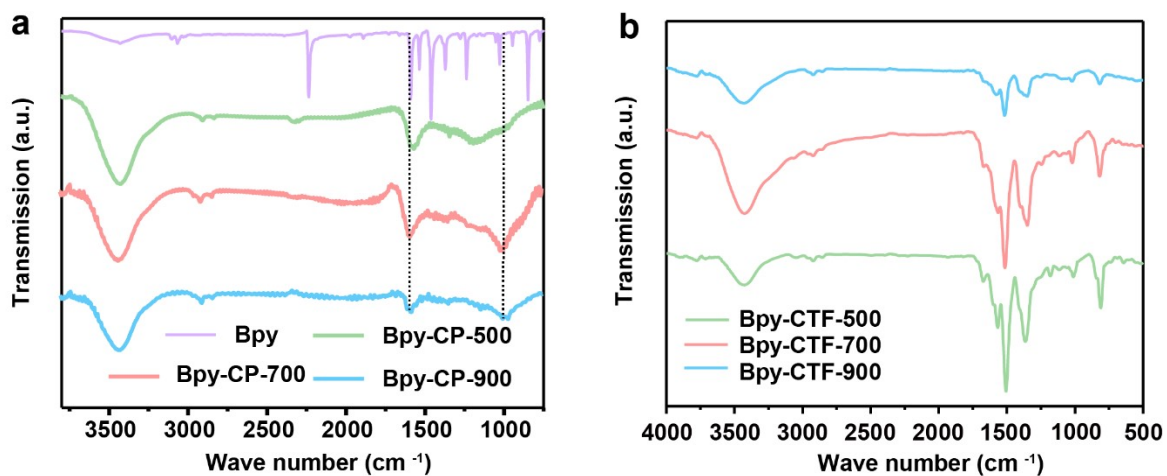

**Fig. S1** (a) FT-IR spectra of the monomer Bpy and Bpy-CP-500/700/900. (b) FT-IR spectra of the Bpy-CTF-500/700/900.

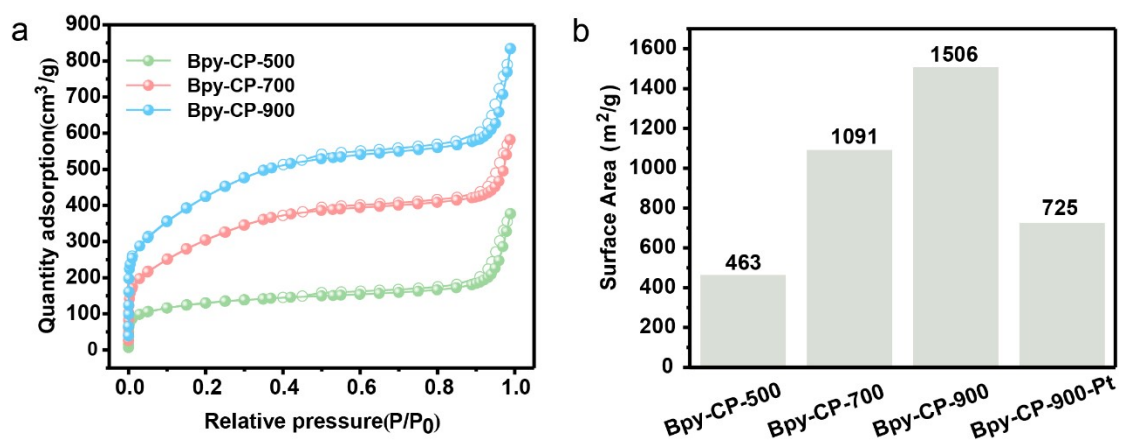

**Fig. S2** (a) The  $\text{N}_2$  adsorption-desorption isotherms (77 K) of Bpy-CP-500, Bpy-CP-700, and Bpy-CP-900. (b) The BET surface area of Bpy-CP-500/700/900 and Bpy-CP-900-Pt.

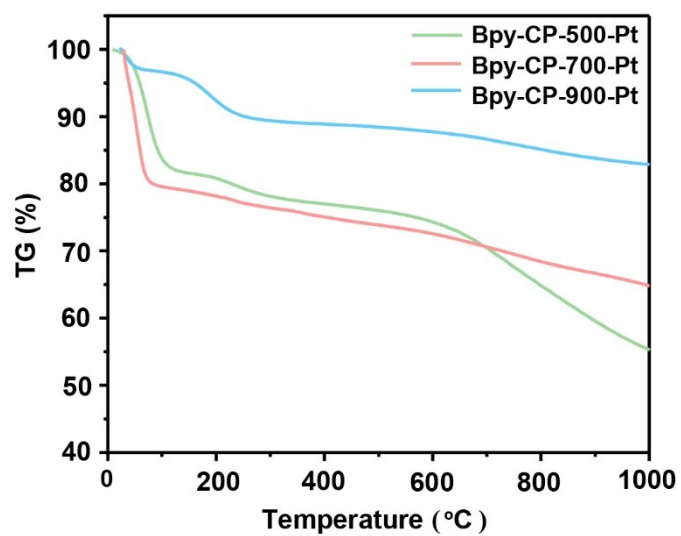

**Fig. S3** Thermogravimetric curve for Bpy-CP-500-Pt, Bpy-CP-700-Pt, and Bpy-CP-900-Pt.

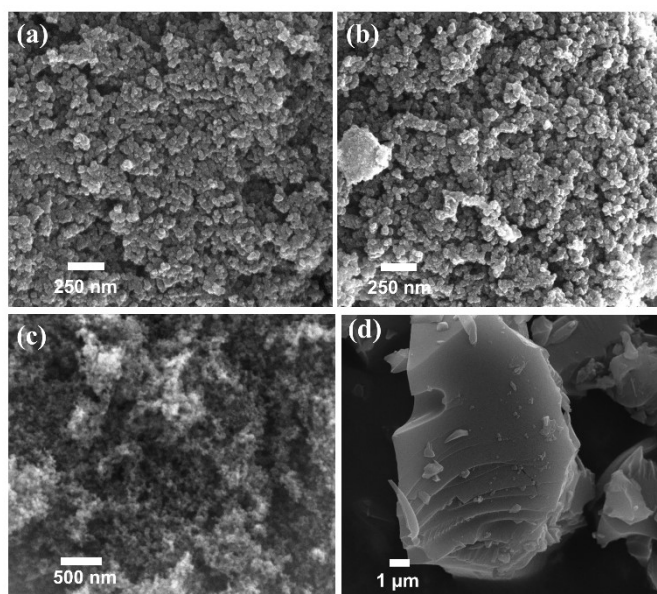

**Fig. S4** The Scanning electron microscope (SEM) image of (a) Bpy-CP-500, (b) Bpy-CP-700, (c) CPs, and (d) Bpy-CTF-900

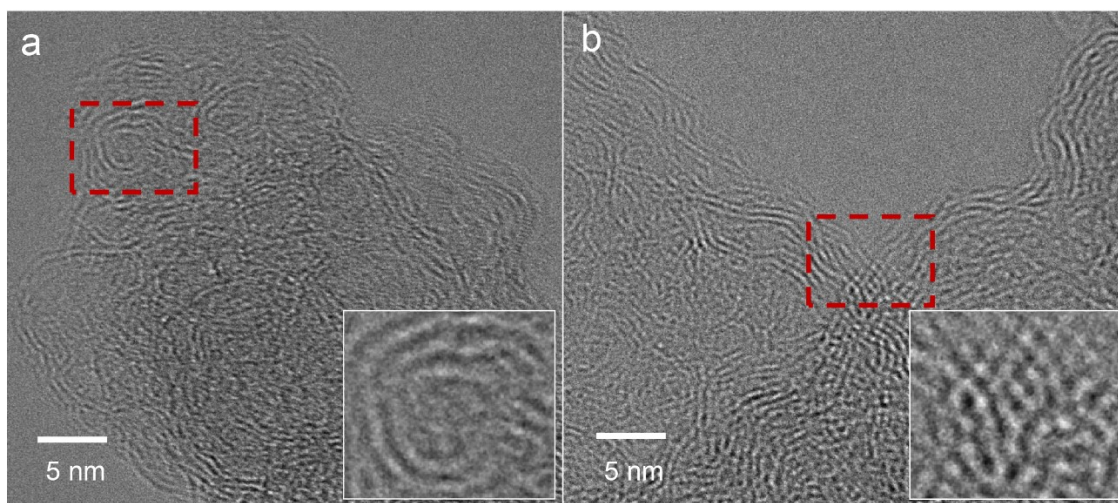

**Fig. S5** The HR-TEM images of Bpy-CP-500-Pt (a) and Bpy-CP-700-Pt (b) with 5% theoretical weight loading.

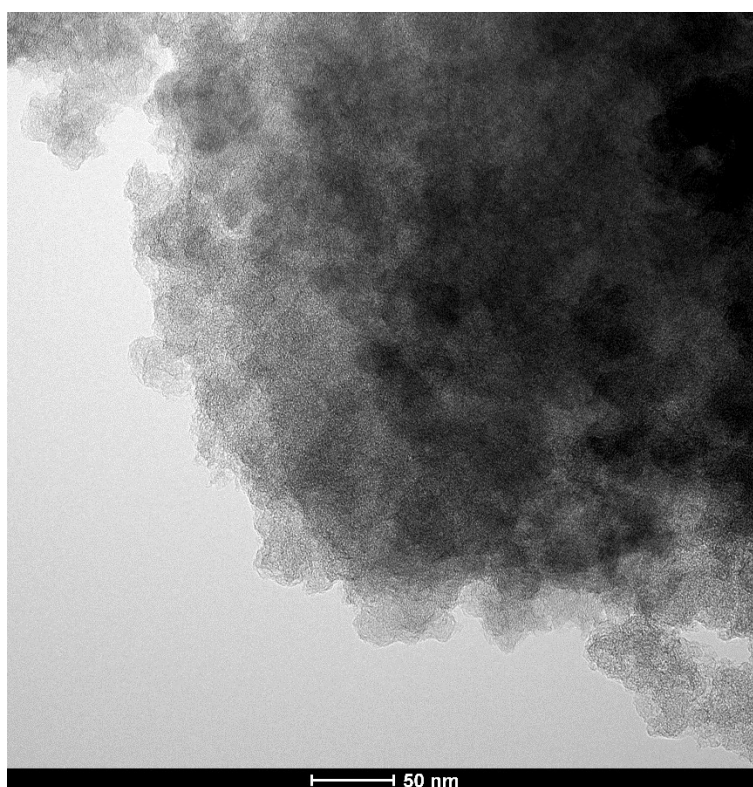

**Fig. S6** The HR-TEM image of Bpy-CP-900-Pt (3 wt%).

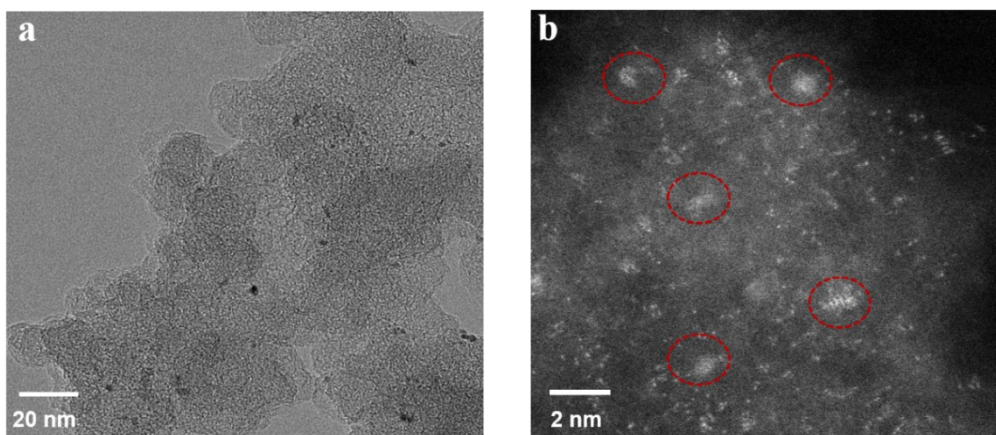

**Fig. S7** The HR-TEM (a) and AC-STEM images (b) of Bpy-CP-900-Pt with 10% theoretical weight loading.

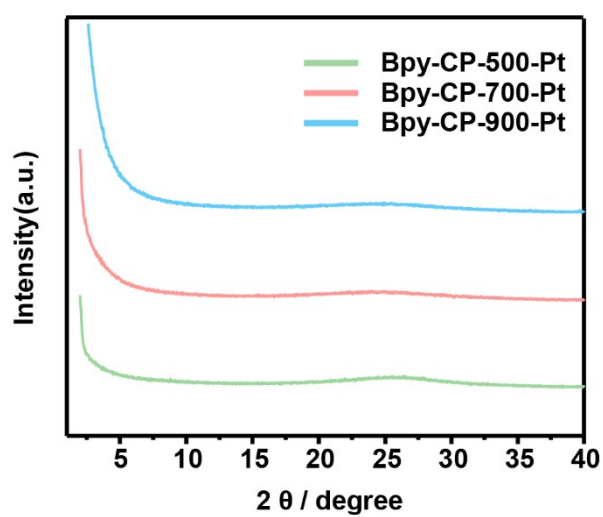

**Fig. S8** XRD pattern of Bpy-CP-500-Pt, Bpy-CP-700-Pt, and Bpy-CP-900-Pt.

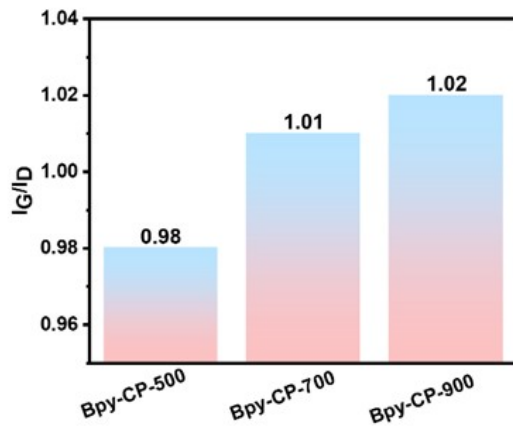

**Fig. S9** The  $I_G/I_D$  ratios of the Bpy-CP-500, Bpy-CP-500, and Bpy-CP-900.

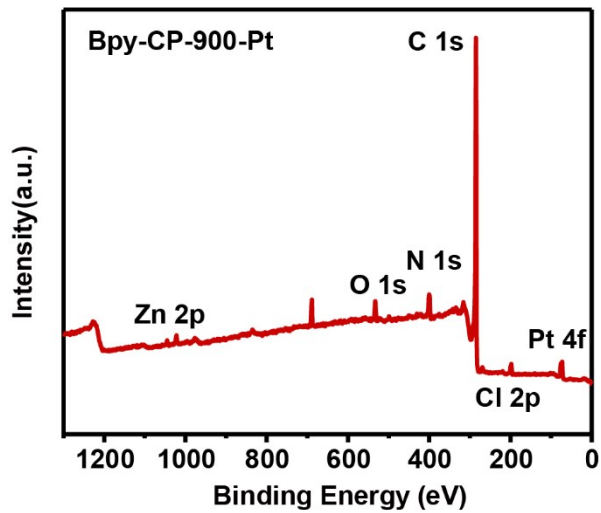

**Fig. S10** The full XPS spectrum of Bpy-CP-900-Pt.

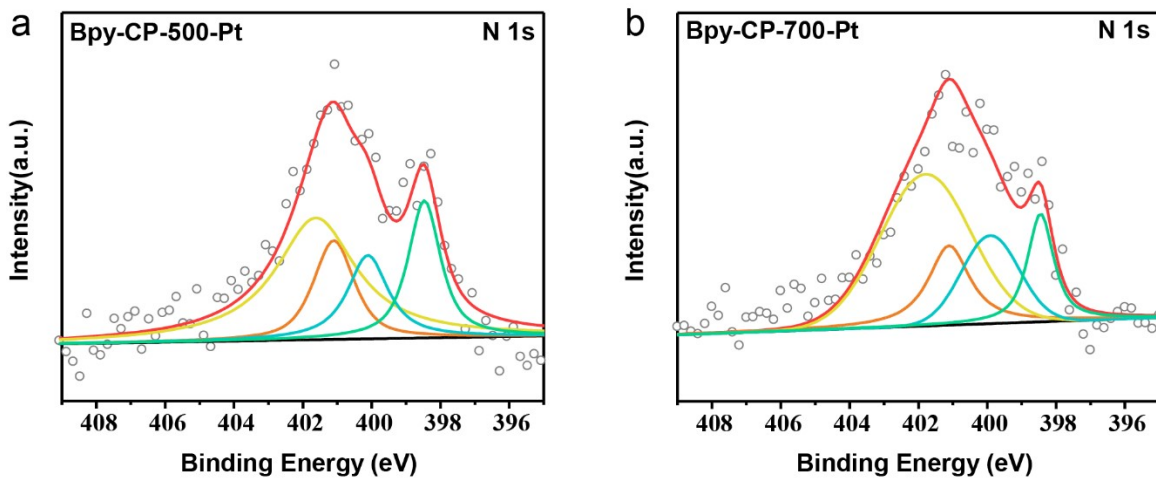

**Fig. S11** The N 1s of XPS spectrum of Bpy-CP-500-Pt (a) and Bpy-CP-700-Pt (b).

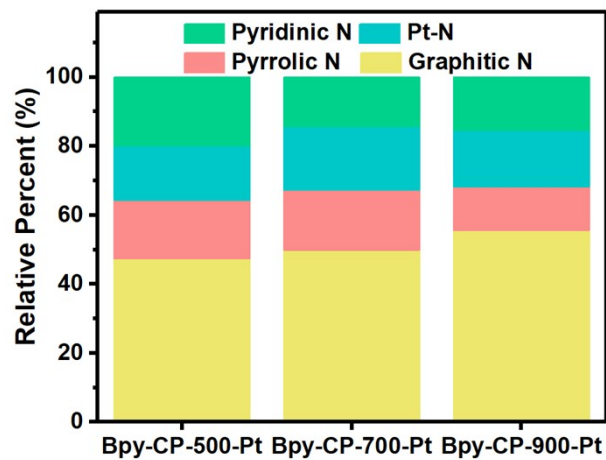

Fig. S12 Relative percentage of four N species in catalysts.

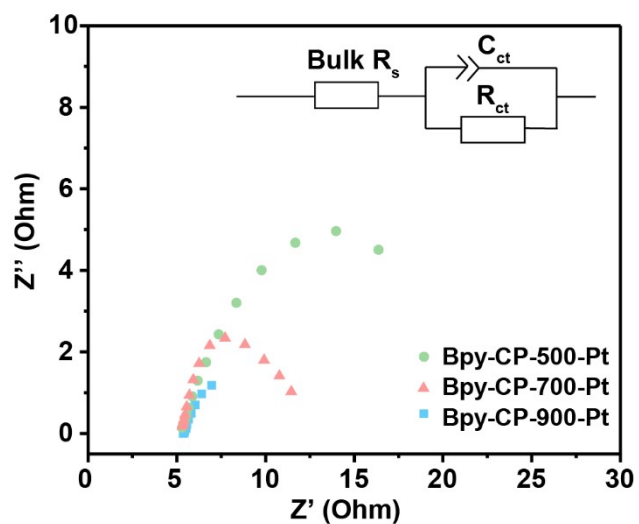

Fig. S13 The Nyquist plots of the Bpy-CTF-500-Pt, Bpy-CTF-700-Pt, and Bpy-CTF-900-Pt.



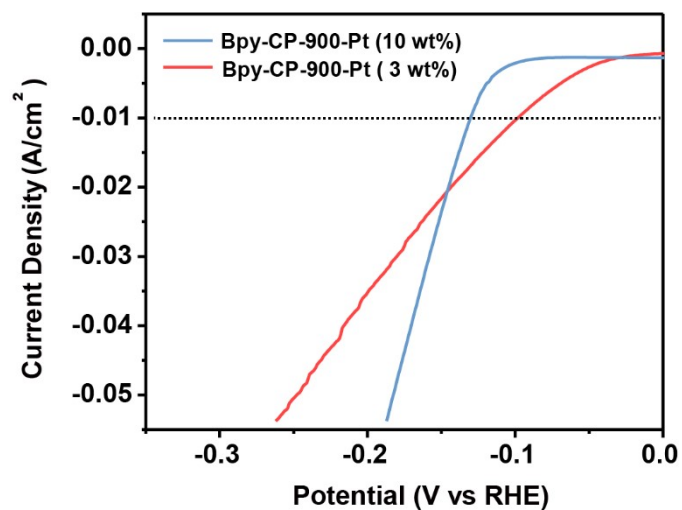

**Fig. S14** The polarization curves of Bpy-CP-900-Pt (10 wt%) and Bpy-CP-900-Pt (3 wt%)

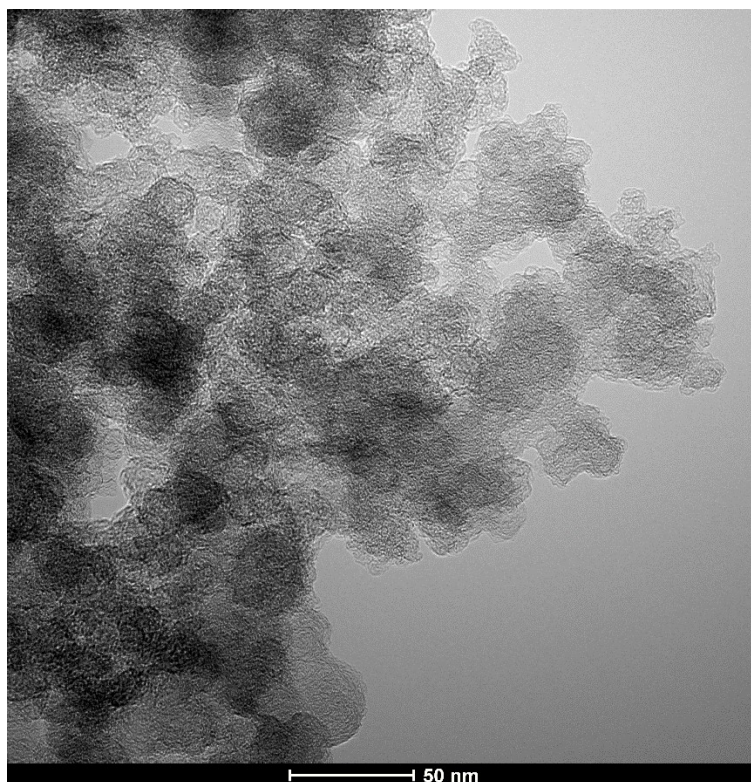

**Fig. S15** The HR-TEM image of Bpy-CP-900-Pt after a long-time stability test.

**Table S1** Element analyst of Bpy-CP-500-Pt, Bpy-CP-700-Pt, and Bpy-CP-900-Pt.

| Catalyst      | Content of C (%) | Content of N(%) | Content of H (%) |
|---------------|------------------|-----------------|------------------|
| Bpy-CP-500-Pt | 49.27            | 15.21           | 3.09             |
| Bpy-CP-700-Pt | 71.35            | 5.11            | 2.25             |
| Bpy-CP-900-Pt | 76.75            | 3.04            | 1.71             |

**Table S2** The HER activity of recently reported Pt-based single-atom catalysts.

| Catalyst                             | Overpotential<br>of 10 mA/cm <sup>2</sup><br>(mV) | Tafel slope<br>(mV/dec) | Reference                                             |
|--------------------------------------|---------------------------------------------------|-------------------------|-------------------------------------------------------|
| Pt-SAs/WSe <sub>2</sub>              | 118                                               | 41                      | <i>Nat. commun.</i> 2021, 12, 3021                    |
| Pt-SAs/MoS <sub>2</sub>              | 59                                                | 31                      |                                                       |
| Pt@PCM                               | 105                                               | 65.3                    | <i>Sci. Adv.</i> 2018, 4, 6657                        |
| Pt <sub>1</sub> @Fe-N-C              | 60                                                | 42                      | <i>Adv. Energy Mater.</i> 2018, 8,<br>1701345         |
| Pt <sub>1</sub> /OLC                 | 38                                                | 36                      | <i>Nat. Energy</i> 2019, 4, 512                       |
| Pt <sub>SA</sub> /N-C                | 130                                               | 67                      | <i>Small.</i> 2021, 17, 2005713                       |
| Pt SA/m-WO <sub>3-x</sub>            | 38                                                | 45                      | <i>Angew. Chem. Int. Ed.</i> 2019,<br>58, 16038-16042 |
| Pt-MoS <sub>2</sub>                  | 60                                                | 96                      | <i>Energy Environ. Sci.</i> 2015, 8,<br>1594-1601     |
| Pt/TiO <sub>2</sub> -OVs             | 60                                                | 34                      | <i>Mater. Today Energy.</i> 2021,<br>20, 100653       |
| Pt/VS <sub>2</sub> /CP               | 77                                                | 39.46                   | <i>ACS Nano.</i> 2020, 14, 5600-<br>5608              |
| Pt/f-MWCNT                           | 43.9                                              | 30                      | <i>Nano Energy</i> 2019, 63, 103849                   |
| Pt <sub>1</sub> -Mo <sub>2</sub> C-C | 155                                               | 64                      | <i>J. Energy Chem.</i> 2021, 57,<br>371-377           |
| <b>Bpy-CP-900-Pt</b>                 | <b>54</b>                                         | <b>29</b>               | <b>This work</b>                                      |
